# Supplementary material for: Water-Based Synthesis of CsPbBr₃ Perovskite Nanocrystals Under Ambient Conditions
Source: Research Square preprint supplement (doi:10.21203/rs.3.rs-6443068/v1), 2025-04-18
Supplement: Supplementary file 1 [file f628b8bc96949e70b2b7c946.docx]

**Water-Based Synthesis of CsPbBr3 Perovskite Nanocrystals Under Ambient Conditions**

Zhaoyi Dua, Jiewen Weib, Ding Dingb, Martina Rimmeleb, Yueyao Dongc, Davide Nodarib, Francesco Furlanb, George Morgana,d, Peter Akinshina,d, William Rodriguez Kazeema, Gwilherm Kerhervee, Martin Heeneyb,f, Thomas J. Macdonaldc, Saif A. Haqueb, Nicola Gasparinib, David J. Payne and Martyn A. McLachlana*

a Department of Materials, Molecular Sciences Research Hub, Imperial College London, London, W12 0BZ, UK

b Department of Chemistry, Molecular Sciences Research Hub, Imperial College London, London, W12 0BZ, UK

c Department of Electronic and Electrical Engineering, Reynolds Building, University College London, London, WC1E 6BT, UK

d Now *at* Clarendon Laboratory, Department of Physics, University of Oxford, Oxford OX1 3PU, UK

e Department of Materials, Imperial College London, Exhibition Road, London SW7 2AZ, UK

f King Abdullah University of Science & Technology (KAUST), Thuwal, 23955-6900, Saudi Arabia

g NEOM Education, Research, and Innovation Foundation, Al Khuraybah, Tabuk 49643-9136, Saudi Arabia

**Table S1** Compositional details of aqueous solvents containing malic acid (MA) and beta-alanine (βA), their measured pH and conductivity values.

| **Solvent** | **Moles of MA** | **Moles of βA** | **Moles of H2O** | **MA mole Fraction (ΧMA)** | **βA mole fraction (ΧβA)** | **H2O mole fraction**  **(ΧH2O)** | **pH** | **Conductivity**  **(mS / cm)** |
| --- | --- | --- | --- | --- | --- | --- | --- | --- |
| 0 | 0 | 1 | 10 | 0.000 | 0.091 | 0.909 | 7.48 ± 0.1 | 0.1 ± 0.01 |
| **1** | ***0.17*** | ***1*** | ***10*** | ***0.015*** | ***0.090*** | 0.895 | ***4.46 ± 0.1*** | ***15.5 ± 0.56*** |
| ***2*** | ***0.33*** | ***1*** | ***10*** | ***0.029*** | ***0.088*** | 0.883 | ***4.18 ± 0.1*** | ***18.2 ± 1.05*** |
| ***3*** | ***0.5*** | ***1*** | ***10*** | ***0.043*** | ***0.087*** | 0.87 | ***3.91 ± 0.1*** | ***18.2 ± 1.15*** |
| *4* | 0.67 | 1 | 10 | 0.057 | 0.086 | 0.857 | 3.61 ± 0.1 | 17.1 ± 1.21 |
| 5 | 0.83 | 1 | 10 | 0.070 | 0.085 | 0.845 | 3.42 ± 0.1 | 16.7 ± 1.21 |
| 6 | 1 | 1 | 10 | 0.083 | 0.083 | 0.834 | 3.24 ± 0.1 | 13.8 ± 0.85 |
| 7 | 1 | 0.83 | 10 | 0.085 | 0.070 | 0.845 | 3.08 ± 0.1 | 14.2 ± 0.90 |
| 8 | 1 | 0.67 | 10 | 0.086 | 0.057 | 0.857 | 2.98 ± 0.1 | 14.3 ± 0.91 |
| 9 | 1 | 0.5 | 10 | 0.087 | 0.043 | 0.87 | 2.75 ± 0.1 | 14.1 ± 0.85 |
| 10 | 1 | 0.33 | 10 | 0.088 | 0.029 | 0.883 | 2.42 ± 0.1 | 12.3 ± 0.65 |
| 11 | 1 | 0.17 | 10 | 0.090 | 0.015 | 0.895 | 2.22 ± 0.1 | 8.6 ± 0.30 |
| 12 | 1 | 0 | 10 | 0.091 | 0.000 | 0.909 | 1.32 ± 0.1 | 5.7 ± 1.18 |

**Table S2** Measured PNC size and dispersity data obtained from transmission electron microscopy (TEM) images and measured photoluminescence (PL) emission wavelength (λmax) and peak full width at half maximum (FWHM) for samples prepared from 75 μL of aqueous precursor solution.

| **Solvent** | **75 uL HBr-Acetone** | | | |
| --- | --- | --- | --- | --- |
| **Size (nm)** | **Dispersity**  **(nm)** | **lmax**  **(nm)** | **FWHM**  **(nm)** |
| A75 | 9.5 | ± 4.7 | 511.9 | 42.4 |
| B75 | 8.5 | ± 4.1 | 510 | 24.0 |
| C75 | 9.9 | ± 6.4 | 511.9 | 29.0 |
| D75 | 32.3 | ± 18.7 | 518.1 | 23.0 |
| N/A | N/A | N/A | N/A | N/A |

**Table S3** Calculated A1, τ1, A2, τ2, τave, kr and knr of PNCs made with varying concentrations of HBr with 0-hour (unaged) HBr-acetone.

| **Non-aged** | **1.5% HBr** | **2.3% HBr** | **3.0% HBr** | **3.7% HBr** |
| --- | --- | --- | --- | --- |
| A1 | 0.816817 | 0.811209 | 0.820725 | 0.777083 |
| τ1 (ns) | 5.42 | 5.52 | 5.32 | 8.02 |
| A2 | 0.183183 | 0.188791 | 0.179275 | 0.222917 |
| τ2 (ns) | 37.53 | 42.64 | 46.42 | 74.78 |
| τave (ns) | 11.30201 | 12.52791 | 12.68819 | 22.90192 |
| kr (MHz) | 22.41194 | 13.07481 | 13.18549 | 1.536989 |
| knr (MHz) | 66.06788 | 66.74699 | 65.62798 | 42.12748 |

**Table S4** Calculated A1, τ1, A2, τ2, τave, kr and knr of PNCs made with varying concentrations of HBr with 1-hour aged HBr-acetone.

| **Aged 1h** | **1.5% HBr** | **2.3% HBr** | **3.0% HBr** | **3.7% HBr** |
| --- | --- | --- | --- | --- |
| A1 | 0.988401 | 0.857113 | 0.82824 | 0.825139 |
| τ1 (ns) | 4.00 | 4.455 | 3.81 | 3.03 |
| A2 | 0.011599 | 0.142887 | 0.171760 | 0.174861 |
| τ2 (ns) | 22.92 | 28.30 | 23.61 | 20.36 |
| τave (ns) | 4.22 | 7.94 | 7.21 | 6.06 |
| kr (MHz) | 144.5024 | 41.78841 | 29.97226 | 19.53795 |
| knr (MHz) | 92.46445 | 84.15617 | 108.724 | 145.4785 |

Biexponential function used for fitting TRPL data. A1 and A2 are the relative ratio of ratios of the two recombination modes, τ1 and τ2 are PL lifetime of the charge carriers.

The average radiative and non-radiative rates of the charge carriers can be calculated as [20]:

Where kr and knr are radiative and non-radiative recombination rate constants, respectively. The values of kr and knr of the PNCs synthesised with different concentrations of HBr are shown in the rate of radiative recombination decreases with increase of HBr concentration, which is consistent with PLQY results.


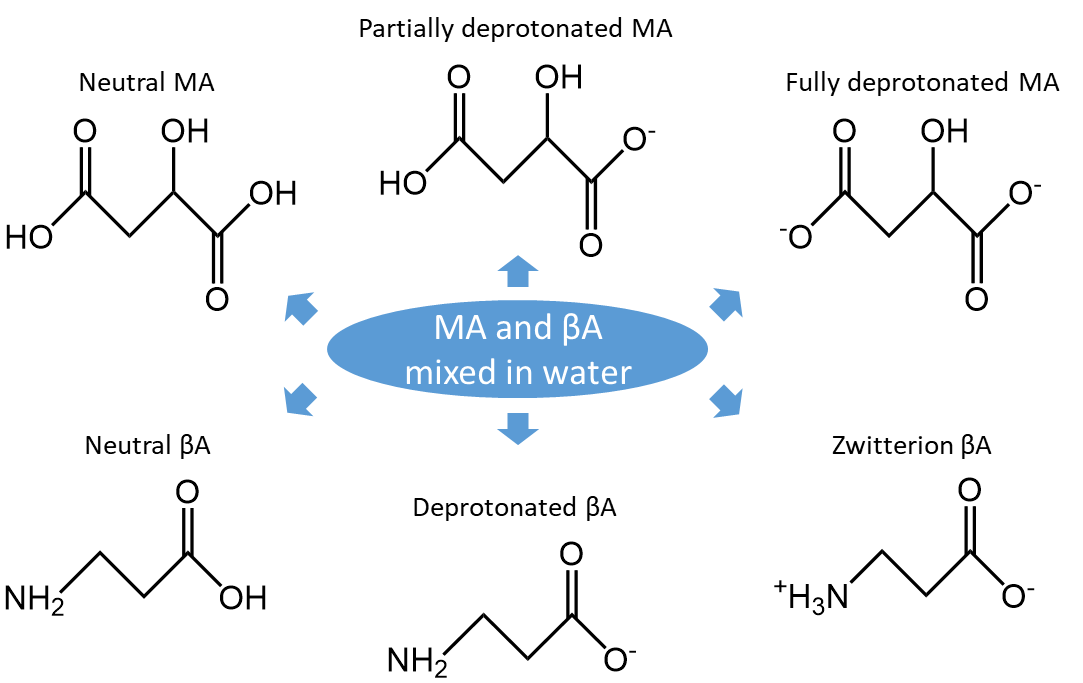


**Figure S1** Possible molecular states of malic acid and beta-alanine aqueous solution.


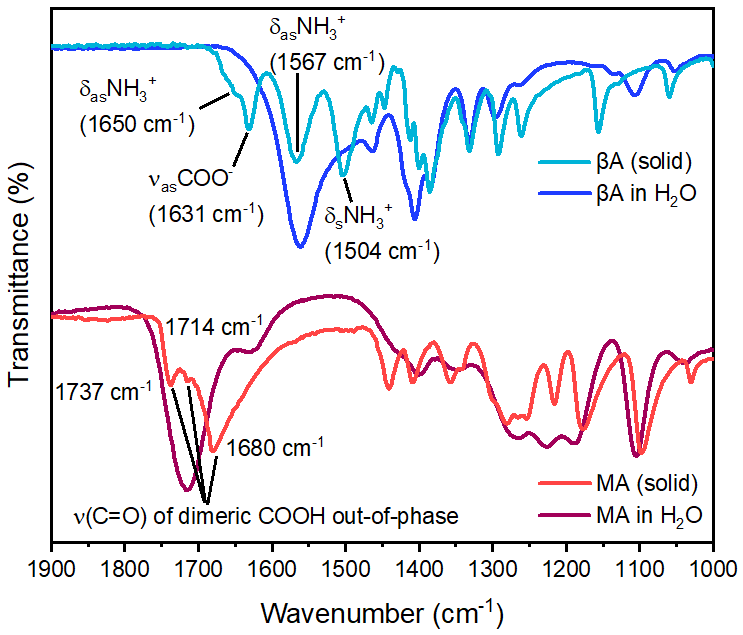


**Figure S2** FTIR spectra of βA and MA solids (in powder form) and their respective aqueous solutions.


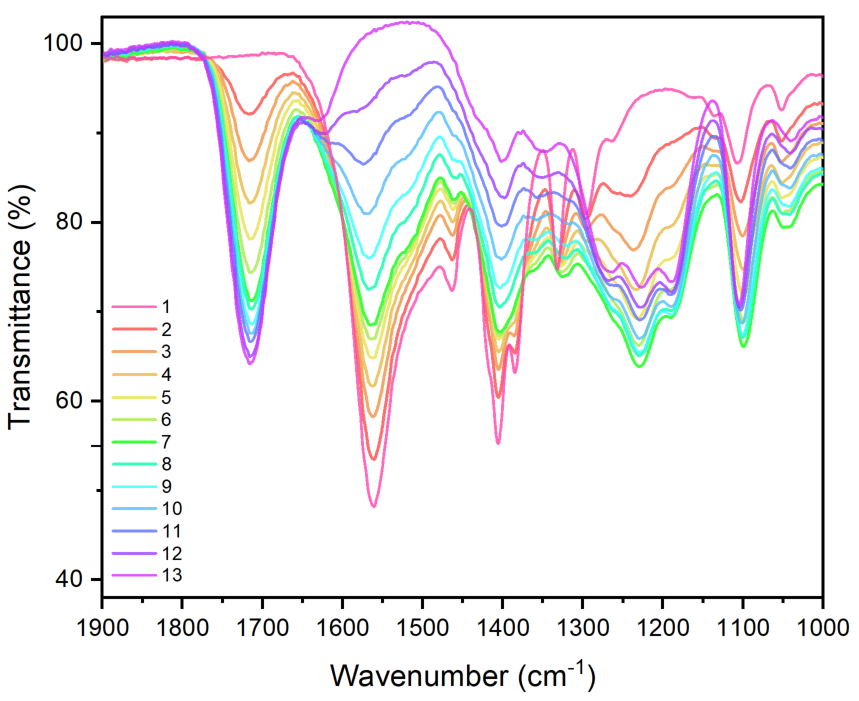


**Figure S3** FTIR spectra of the aqueous solutions of MA and βA mixtures indicated in Table S1.


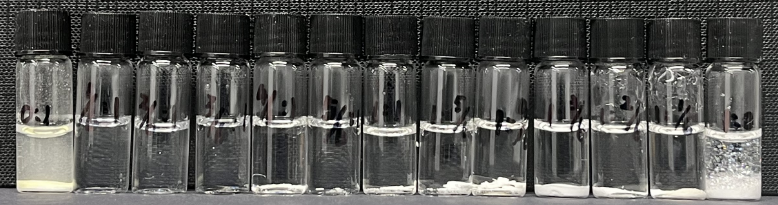


**0** **1 2 3 4 5 6 7 8 9 10 11 12**

**Figure S4** Photograph showing the solubility of 0.2M CsBr and PbBr2 in our aqueous solvents 0-12, red box indicates solvents in which solubility of both precursors was achieved.


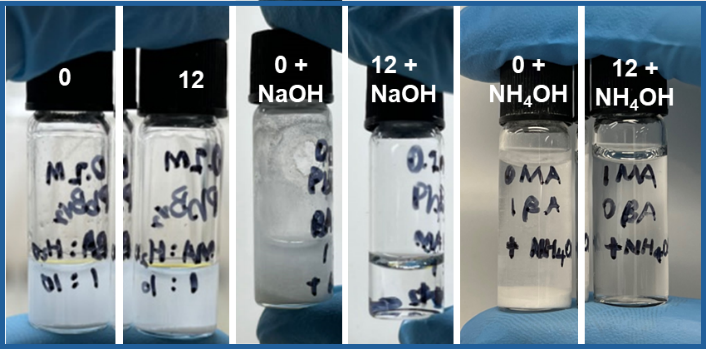


**Figure S5** Solubility test of 0.2M CsBr and PbBr2 in solvents 0 and 12 and following the addition of NaOH or NH3**·**H2O.


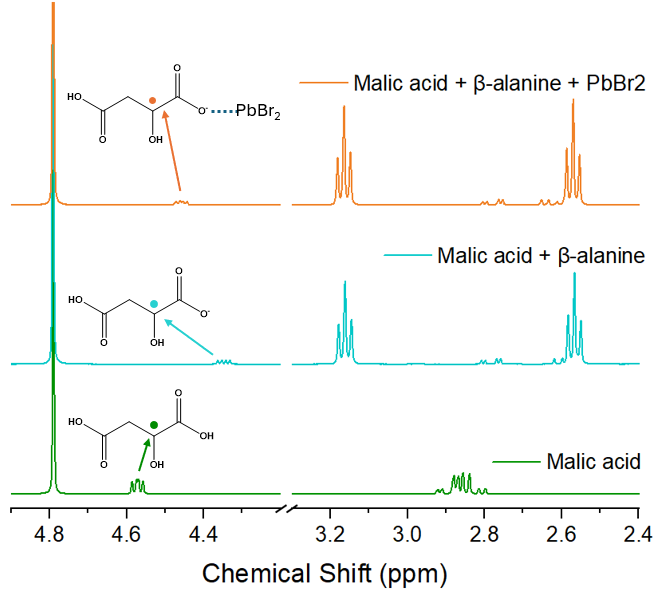


**Figure S6** 1H NMR of malic acid, mixture malic acid and beta-alanine, mixture of malic acid and beta-alanine and PbBr2 in D2O. The signal originating from the proton of -CH2 in βA does not shift on addition of PbBr2, indicating that there is not interaction between the βA and PbBr2. This is reasonable since βA is in zwitterion form in the solution, the positively charged -NH3+ group does not form an adduct with PbBr2. In contrast, the peak of the H in -CH- of MA shifts considerably after the addition of PbBr2. More specifically, the peak of the H in -CH- in pure MA in D2O is at 4.56 ppm. But after the addition of βA, the peak shifted down filed to 4.33 ppm. This shift indicates that the -CH- is shielded by more electrons around. This is reasonable because the amino groups added with the addition of βA deprotonated the carboxyl groups of MA, making them more electron-rich and therefore stronger shielding effect. But after the addition of PbBr2, the -CH- peak shifted downfield again, indicating that the electrons of the carboxylate groups adducted with PbBr2, reducing the density of the electrons near the -CH-.


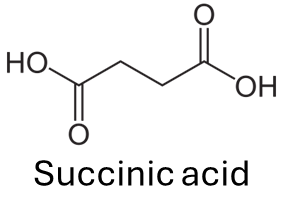


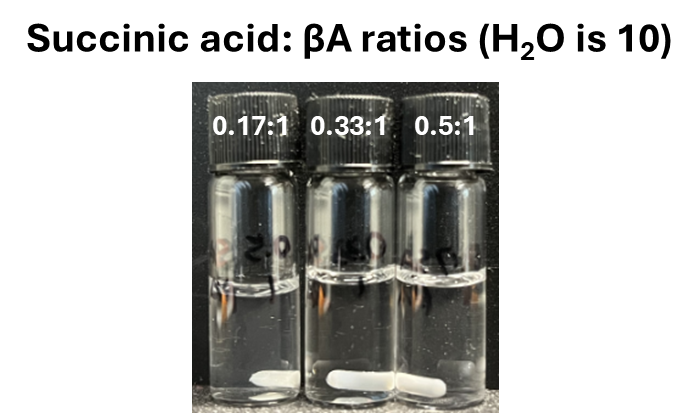


Solvent system equivalent

1. 2 3

**Figure S7** Photograph showing the solubility of 0.2M CsBr and PbBr2 in the aqueous mixture of succinic acid (SA) and βA, the SA quantity mimics that of Solvents 1-3 in Table S1. Succinic acid has similar structure to malic acid, lacking a -OH group adjacent to one of the -COOH groups. This aqueous solvent was capable of dissolving 0.2 mol dm-3 of CsBr and PbBr2, less that the MA equivalent


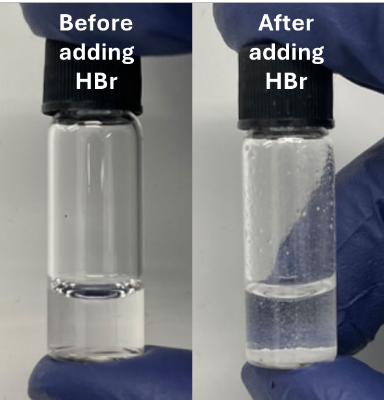


**Figure S8** Images showing CsBr, PbBr2 dissolved in our aqueous before (left) and after (right) the addition of conc. HBr showing the precipitation of PbBr2 not the desired CsPbBr3.


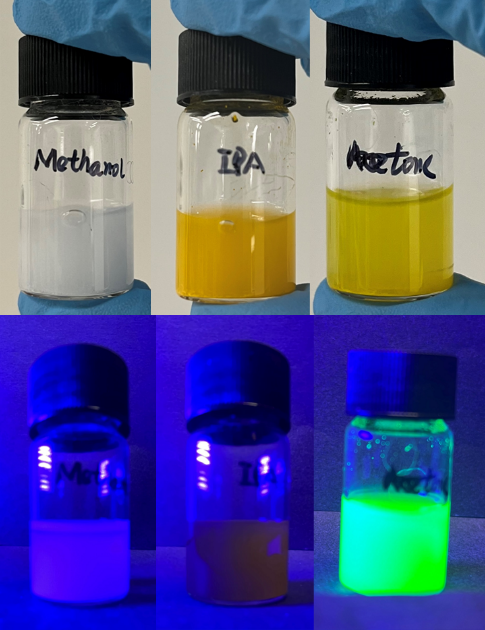


**Figure S9** Images of the solutions resulting from the synthesis carried out with different water-miscible co-solvents (methanol, IPA and acetone) under ambient light (top) and UV light (bottom).


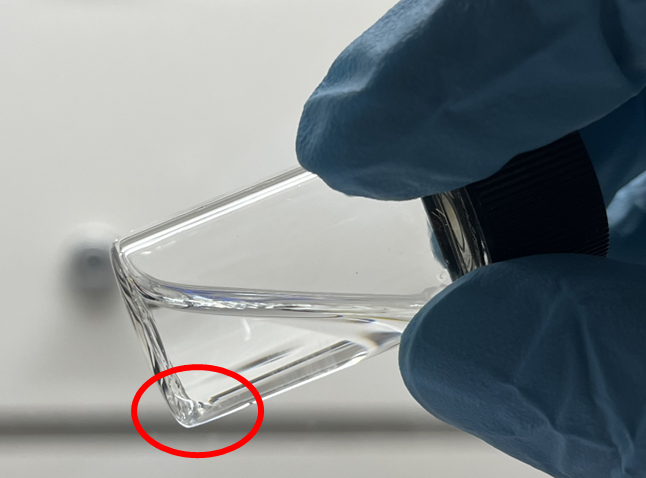

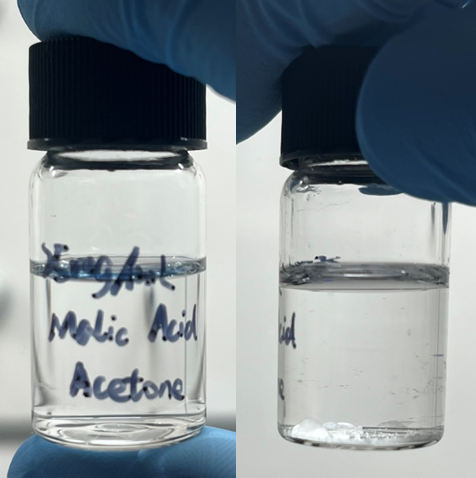


**Figure S10** Images showing the insolubility of our aqueous solvent and precursor mixture in acetone (left), protonated MA (centre) and deprotonated MA (right) in acetone.


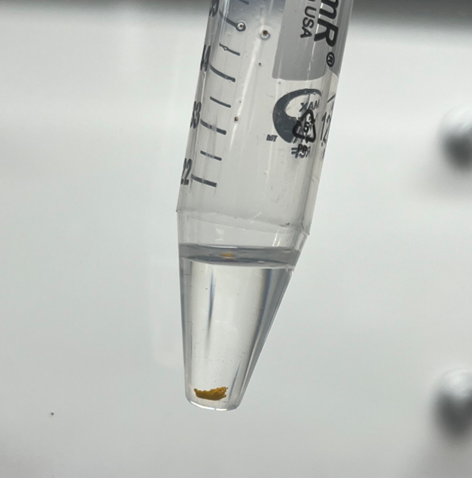


**Figure S11** Image showing the product of synthesis carried out without the addition of OAm following centrifugation.


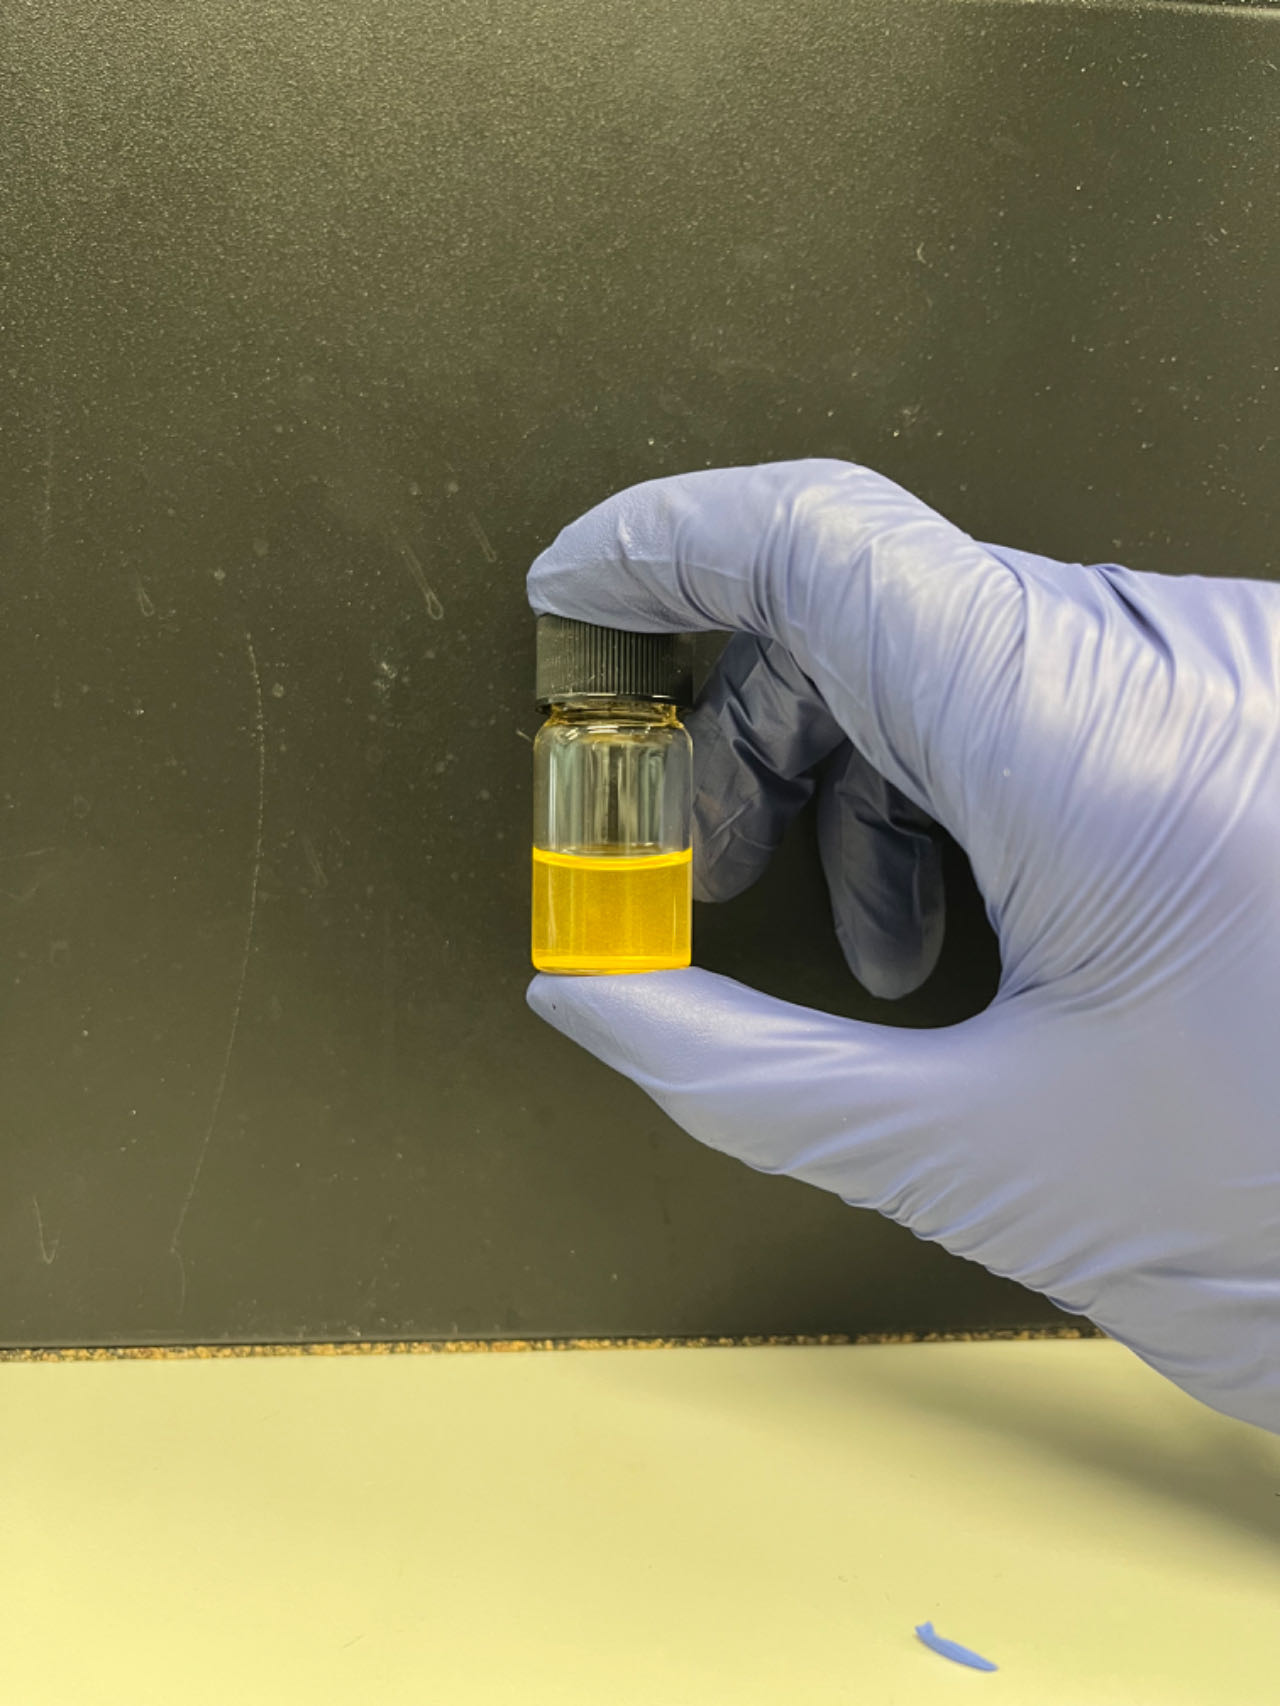


**Figure S12** Image showing precipitate obtained when using the highest (4.4 % v/v) HBr-acetone precipitating solution.


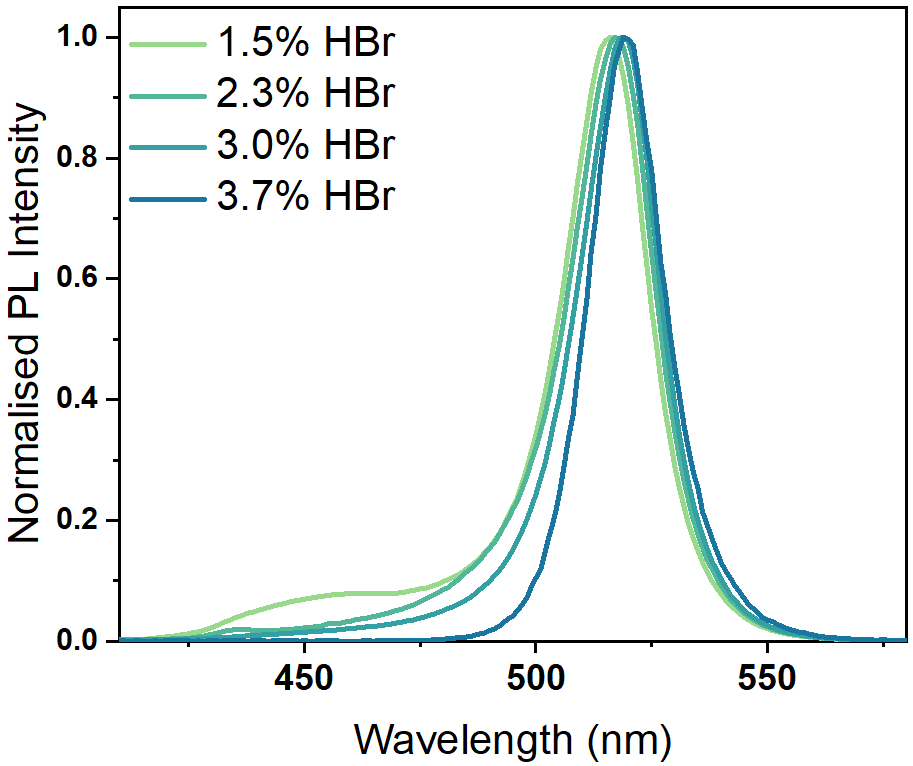


**Figure S13** Photoluminescence (PL) spectra of PNCs prepared using varying concentrations of HBr in acetone.

(a (b (c (d


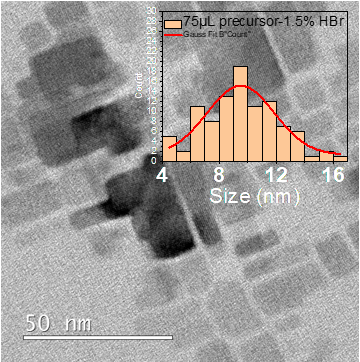

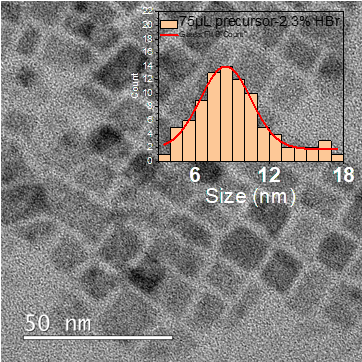

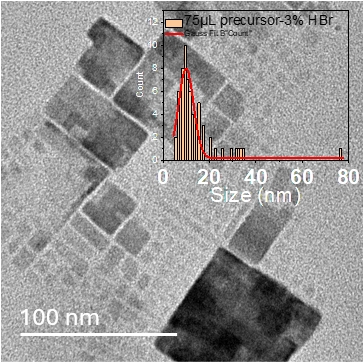

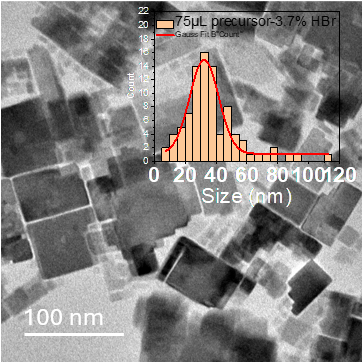


**Figure S14** Representative TEM images of PNCs prepared using 75μL aqueous perovskite precursor solutions and different concentrations of HBr, a) 1.5%, b) 2.3%, c) 3.0% and d) 3.7% v/v.


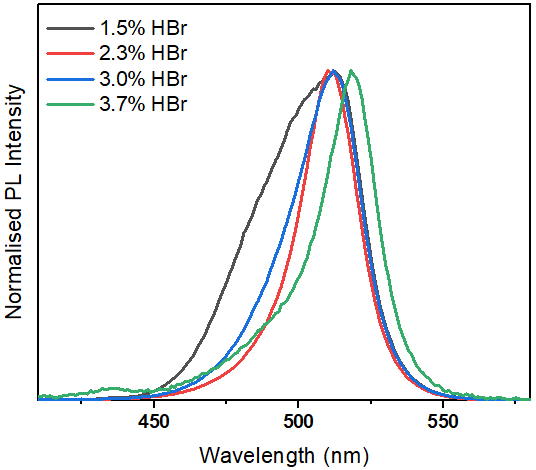


**Figure S15** of PNCs prepared using 75μL aqueous perovskite precursor solutions and varying concentrations of HBr.

(a


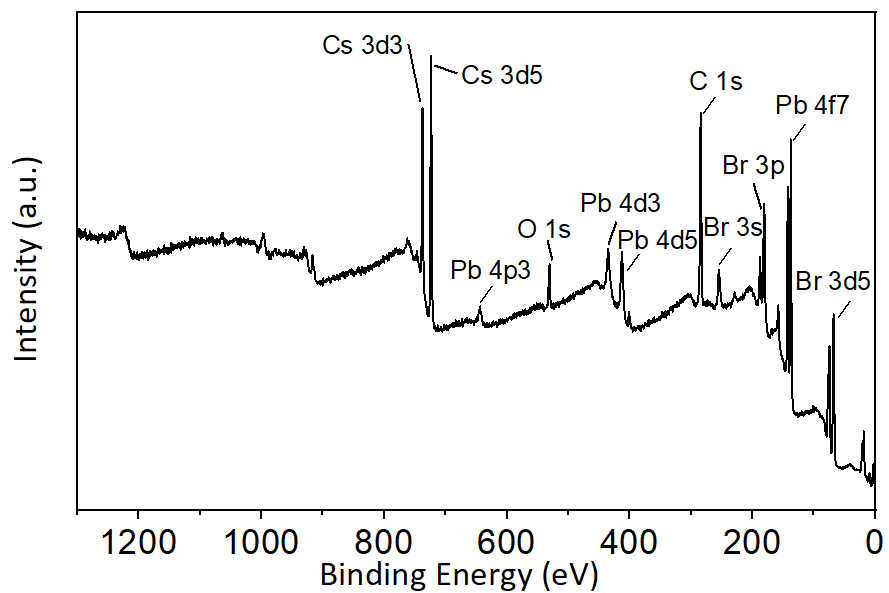


(b (c


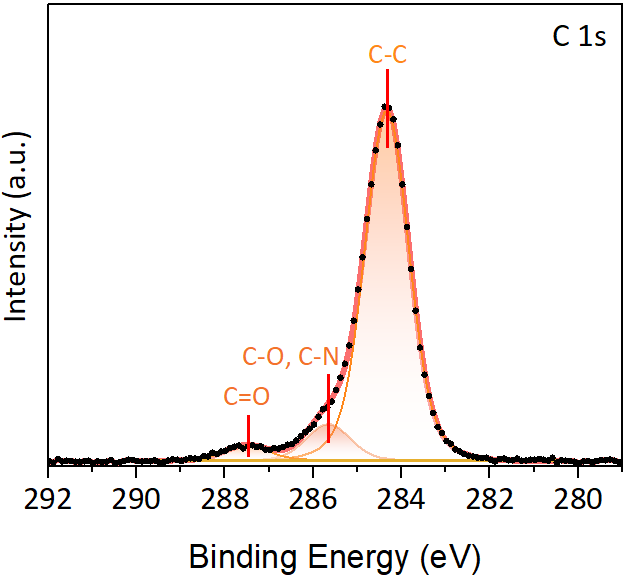

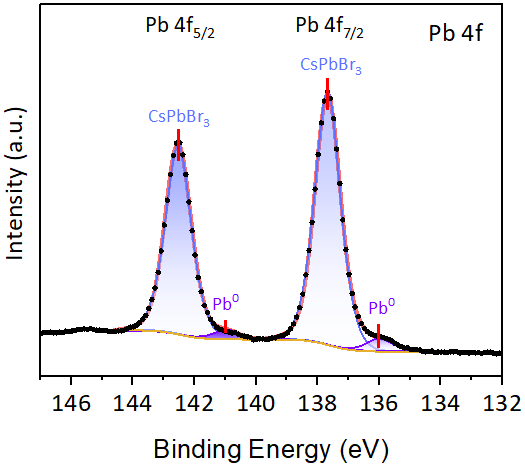


(d (e


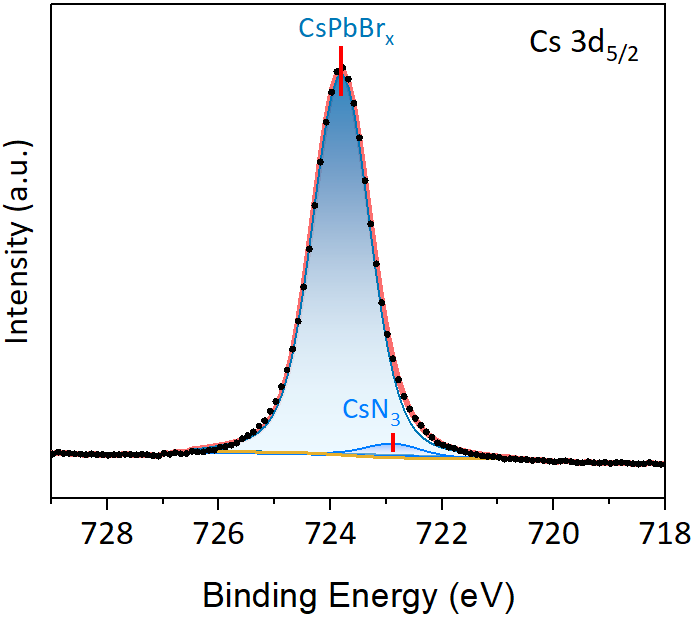

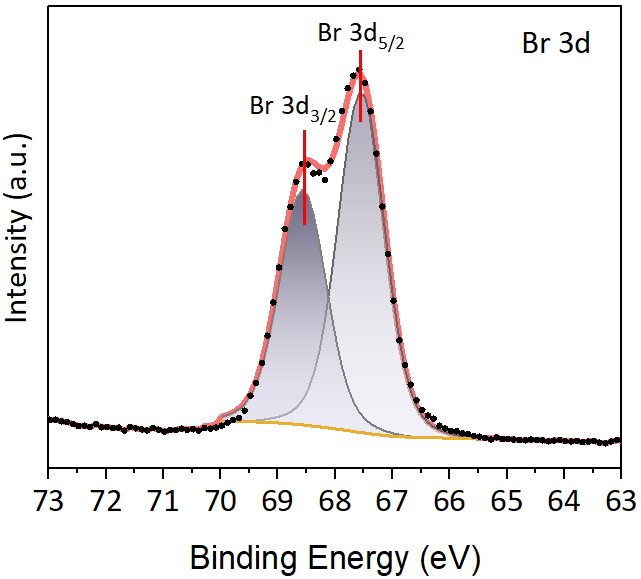


**Figure S16** XPS spectra obtained from CsPbBr3 PNCs, a) survey, b) C 1s, c) Pb 4f, d) Cs 3d5/2 and e) Br 3d.


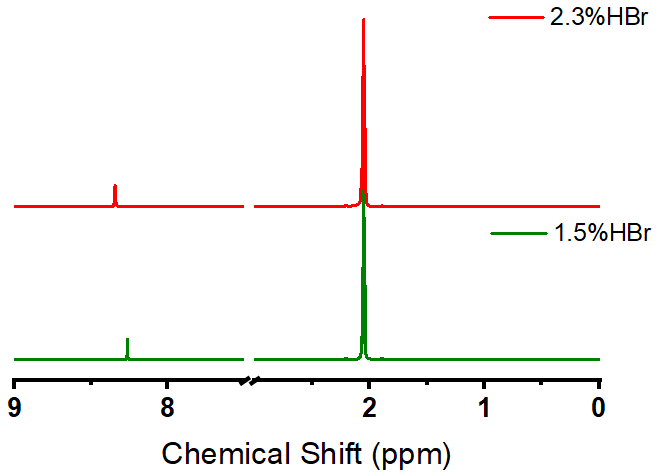


**Figure S17** 1H NMR of HBr-d6-acetone with at different HBr concentrations


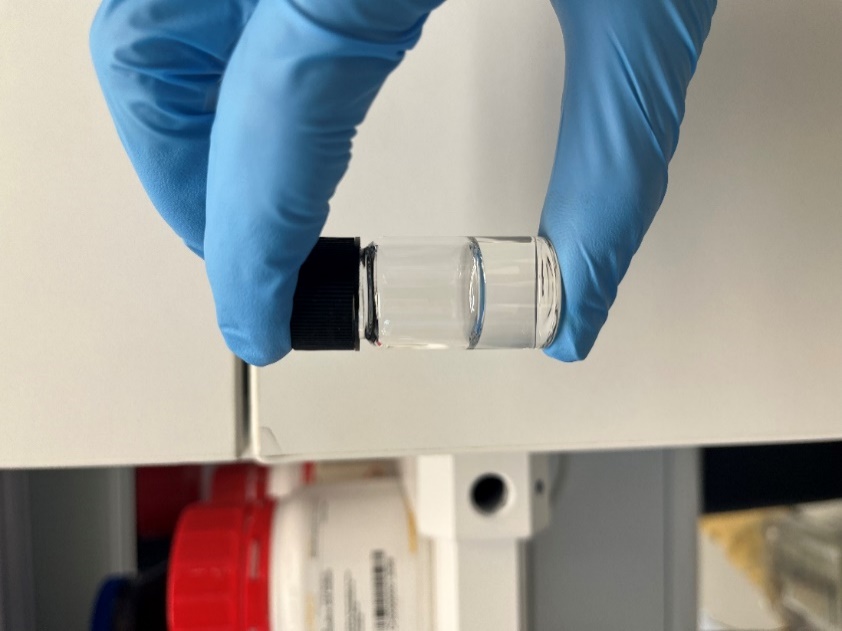

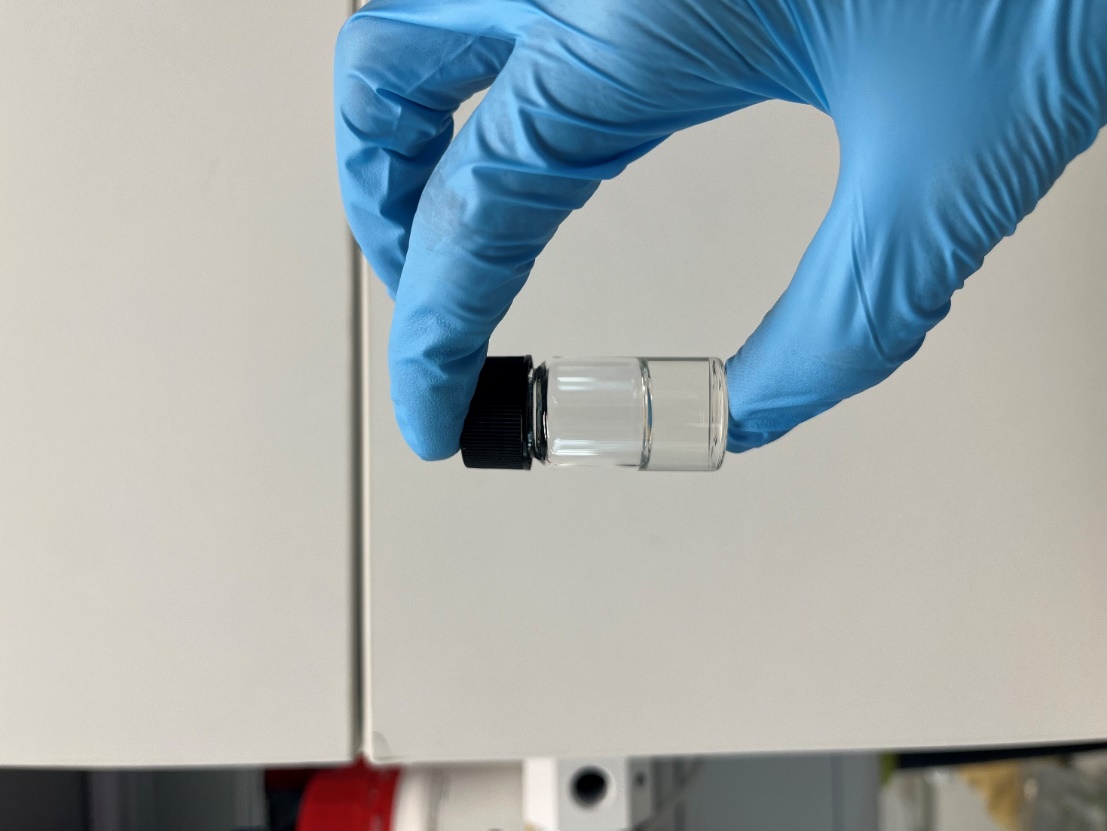

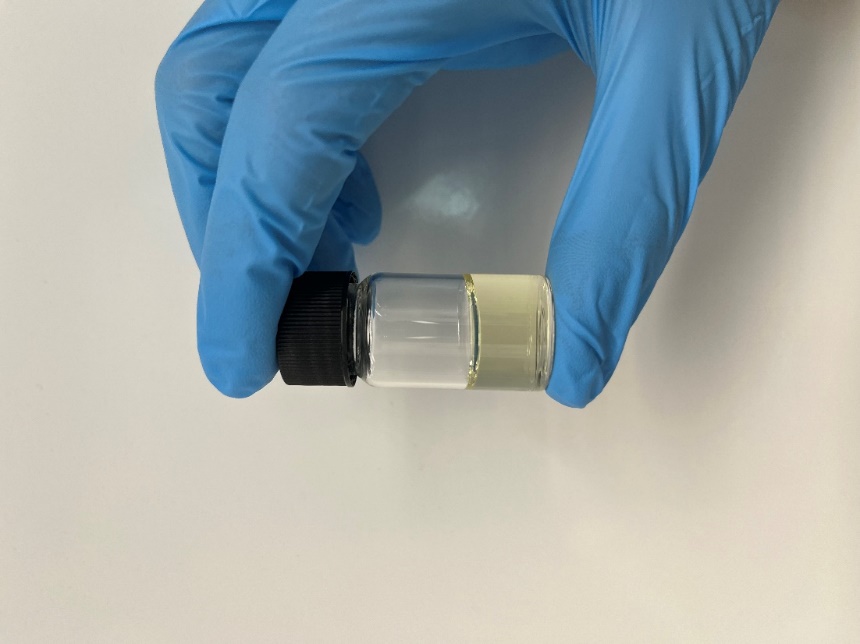


**Figure S18** Images of HBr-acetone solutions immediately after preparation (left), 1-hour after preparation (centre) and 5-hours after preparation (right), note the characteristic brown colour of the solution at this time.


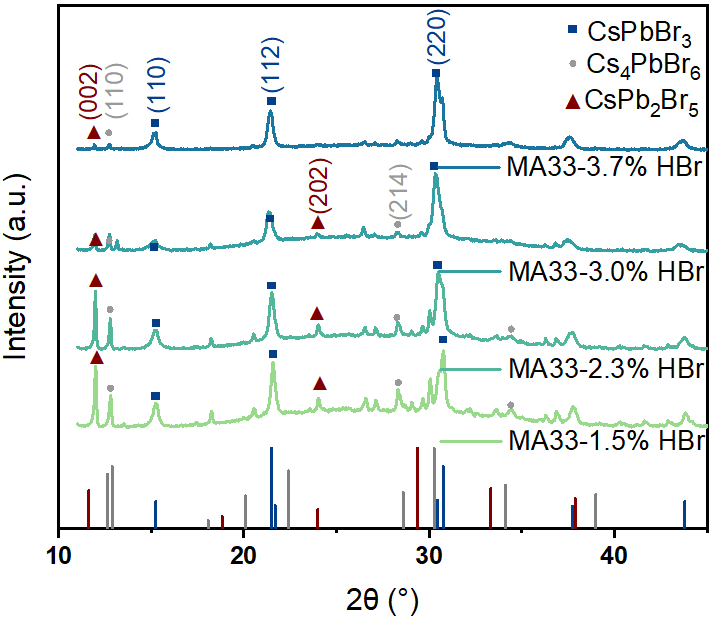


**Figure S19** XRD pattern of PNCs prepared using 1h-aged 1.5%, 2.3%, 3% and 3.7% v/v HBr (reference patterns ICDD 01-090-2544 (blue), ICDD 04-014-8071 (grey) and ICDD 01-090-0382 (red) are also shown).
